# Supplementary material for: Paracoccidioidomycosis after Highway Construction, Rio de Janeiro, Brazil
Source: PubMed Central journal article supplement (PMC5652422; doi:10.3201/eid2311.170934), 2017-11
Supplement: 17-0934-Techapp-s1.pdf [file 17-0934-Techapp-s1.pdf]

# Paracoccidioidomycosis during Highway Construction, Rio de Janeiro, Brazil

## Technical Appendix.

**Technical Appendix Table 1.** Characteristics for 8 patients with paracoccidioidomycosis during highway construction, Rio de Janeiro, Brazil\*

| Patient no. | Age, y/sex | Residence distance from highway, km | Municipality/year of highway construction | Symptom onset/exposure time, mo | Date of diagnosis | Diagnostic technique/sample                                 | Complication /outcome                                                                                      |
|-------------|------------|-------------------------------------|-------------------------------------------|---------------------------------|-------------------|-------------------------------------------------------------|------------------------------------------------------------------------------------------------------------|
| 1           | 31/F       | 9.8                                 | DC/2013                                   | 2015 Apr/≤27                    | 2015 Dec          | Culture/lymph node aspirate                                 | None/clinical cure, still being treated                                                                    |
| 2           | 21/F       | 9.5                                 | NI/2013                                   | 2014 Aug/≤19                    | 2016 Jan          | Histologic analysis/lymph node for biopsy                   | Adrenal insufficiency/ clinical cure, still being treated                                                  |
| 3           | 28/F       | 9.3                                 | MES/2013                                  | 2015 Jul/≤30                    | 2016 Feb          | Histologic analysis/lymph node and spleen sample for biopsy | Adrenal and respiratory insufficiency, tracheostomy/ clinical improvement, treatment suspended (pregnancy) |
| 4           | 27/M       | 4.7                                 | NI/2013                                   | 2015 Dec/≤35                    | 2016 Mar          | Culture/lymph node aspirate                                 | None/clinical cure, still being treated                                                                    |
| 5           | 23/F       | 0.1                                 | DC/2013                                   | 2015 Apr/≤27                    | 2016 Apr          | Direct examination/skin sample for biopsy                   | Adrenal insufficiency/ clinical cure, still being treated                                                  |
| 6           | 23/M       | 12.3                                | DC/2013                                   | 2015 Dec/≤35                    | 2016 Jun          | Culture/lymph node aspirate                                 | Cholestasis/ clinical cure, still being treated                                                            |
| 7           | 19/M       | 14.2                                | NI/2013                                   | 2016 Jan/≤36                    | 2016 Jun          | Culture/lymph node aspirate and blood                       | Vasculitis, esophageal fistulae/died                                                                       |
| 8           | 10/M       | 16.6                                | SEP†/2013                                 | 2016 Jul/≤42                    | 2016 Oct          | Serologic analysis/blood                                    | NA (lost to followup)                                                                                      |

\*Exposure to *Paracoccidioides* conidia might may have occurred during highway construction or subsequently as a consequence of massive earth removal from areas with native forests where the fungus was present. This anthropic activity might result in a recurrent or continuous aerial dispersion of fungal propagules during and after construction. The incubation time for acute/subacute paracoccidioidomycosis is unknown, but it might be long because there are no reports of this disease in children <2.5 years of age, in contrast with other pulmonary systemic mycoses, such as histoplasmosis, coccidioidomycosis, and blastomycosis. DC, Duque de Caxias; MES, Mesquita; NA, not available; NI, Nova Iguaçu; NIL, Nilópolis; SEP, Sepetiba. †Although the residence of patient 8 was in Sepetiba, he had also lived in Duque de Caxias.

**Technical Appendix Table 2.** Observed and expected monthly rainfall indexes for Duque de Caxias, Rio de Janeiro, Brazil, 2012–2016\*

| Year     | Month, mm    |              |              |       |             |              |             |             |              |             |              |              | Total, mm |
|----------|--------------|--------------|--------------|-------|-------------|--------------|-------------|-------------|--------------|-------------|--------------|--------------|-----------|
|          | Jan          | Feb          | Mar          | Apr   | May         | Jun          | Jul         | Aug         | Sep          | Oct         | Nov          | Dec          |           |
| 2012     | NA           | NA           | NA           | NA    | 141.2       | 143.6        | 45.8        | 33.6        | 140.4        | 95.8        | 241.2        | 129.2        | >970.8    |
| 2013     | 590.2        | 91.2         | 471.2        | 127.0 | 158.2       | 66.2         | 188.6       | 39.8        | 87.8         | 102.6       | 260.0        | 318.2        | 2,501.0   |
| 2014     | 67.4         | 50.8         | 160.2        | 215.0 | 75.4        | 99.8         | 50.2        | 58.8        | 51.0         | 110.6       | 196.2        | 105.2        | 1,240.6   |
| 2015     | 141.8        | 0            | 229.4        | 70.2  | <b>43.0</b> | <b>157.0</b> | <b>34.2</b> | <b>21.0</b> | <b>138.1</b> | <b>52.8</b> | <b>251.8</b> | <b>111.4</b> | 1,250.7   |
| 2016     | <b>528.6</b> | <b>344.8</b> | <b>199.0</b> | 12.6  | 65.6        | 161.8        | 8.0         | 68.8        | 123.8        | 116.2       | 650.0        | 244.0        | 2,523.2   |
| Expected | 366.3        | 176.2        | 270.9        | 183.7 | 111.0       | 80.6         | 85.4        | 64.2        | 110.2        | 101.4       | 341.5        | 330.5        | 2,221.9   |

\*Measurements in 2012 started in May. Bold indicates months when the El Niño phenomenon occurred. NA, not available.
